# Supplementary material for: Preferences for home- and community-based long-term care services in Germany: a discrete choice experiment
Source: Springer Nature journal article supplement (doi:10.1007/s10198-018-0968-0), 2018-04-06
Supplement: MOESM1 [file 15596722]

**Electronic Supplementary Material: Figure S1:** Sample Selection Flowchart

Returned Questionnaires (=used for data analysis) = 1,209 (**response rate = 23.4%**)

Shortfalls/Drop-outs* = 549 (10.64%)

*no address / incorrect address

Drop-outs* = 700 (13.57%)

*did not return the postal questionnaire or did not fill out the online questionnaire

Agreed to participate* (recruited) = 1,909 (36.99%)

*via printed/postal questionnaires (n=224), online questionnaire (n=1,685)

Net Interviews = 2,458 (47.65%)

Shortfalls* = 2,702 (52.36%)

*top three causes: 1) dropout - refusal of household contact person (n=1,499), 2) dropout - household has no time or interest (n=535), 3) dropout - no answer - free-line signal (n=254)

**Total Expected Sample** = 5,160 (100%)
